# Supplementary material for: Improved Prefrontal Activity and Chewing Performance as Function of Wearing Denture in Partially Edentulous Elderly Individuals: Functional Near-Infrared Spectroscopy Study
Source: PLoS One. 2016 Jun 30;11(6):e0158070. doi: 10.1371/journal.pone.0158070 (PMC4928845; doi:10.1371/journal.pone.0158070)
Supplement: S4 Fig — (XLSX) [file pone.0158070.s004.xlsx]

## Sheet: Sheet1
S8.Fig4
Figure 4. Temporal changes under Tooth Loss and Wearing Denture conditions
Each session was repeated 5 times and obtained values were averaged using the ‘integral mode’ of the ETG-100 software for both the chewing and rest sessions.
time	Ch1Wearing Denture	Ch1Tooth Loss	Ch2Wearing Denture	Ch2Tooth Loss	Ch3Wearing Denture	Ch3Tooth Loss	Ch4Wearing Denture	Ch4ToothLoss	Ch5Wearing Denture	Ch5Tooth Loss	Ch6Wearing Denture	Ch6Tooth Loss	Ch7Wearing Denture	Ch7Tooth Loss	Ch8Wearing Denture	Ch8Tooth Loss	Ch10Wearing Denture	Ch10Tooth Loss	Ch11Wearing Denture	Ch11Tooth Loss	Ch12Wearing Denture	Ch12Tooth Loss	Ch13Wearing Denture	Ch13Tooth Loss	Ch15Wearing Denture	Ch15Tooth Loss
0s	5.73158e-06	-0.0046681	-0.000359822	-0.00818795	0.000271538	-0.00762976	0.00282894	-0.00523678	-0.0018666	-0.00523319	0.000895627	-0.00231012	-0.00308823	-0.00328745	-0.00129066	-0.00316623	0.00630202	0.000640787	0.00315817	-0.00128955	-0.00548745	-0.0124133	0.00689909	-0.00404593	0.00938477	0.00875343
1s	0.00189046	-0.00468919	0.000634758	-0.00778351	0.0010281	-0.00709647	0.00385931	-0.00508141	0.000129204	-0.00504456	0.00262257	-0.00258793	-0.000614435	-0.00568275	0.000356895	-0.00334698	0.00757636	0.00060847	0.00446433	-0.00119357	-0.0034813	-0.0118529	0.00813082	-0.00440232	0.011074	0.00796416
2s	0.00269597	-0.0043454	0.00177248	-0.00721354	0.00127718	-0.00649453	0.00387284	-0.00477617	0.00171903	-0.00446682	0.00318529	-0.00259309	0.00211696	-0.0064304	0.00119513	-0.00323482	0.00782226	0.000141197	0.00494588	-0.00111135	-0.00192605	-0.0110051	0.00841337	-0.00442654	0.0115957	0.00661463
3s	0.00354641	-0.00373732	0.00261064	-0.00595044	0.00151799	-0.00524245	0.00364877	-0.0044001	0.00376873	-0.00345208	0.00349575	-0.00229353	0.00353504	-0.00514591	0.00217006	-0.00274606	0.00781116	-0.000263824	0.00533842	-0.000872457	3.85417e-06	-0.00938994	0.0082838	-0.00426081	0.0117434	0.00470776
4s	0.00336879	-0.00261729	0.002704	-0.00431184	0.00134091	-0.00318814	0.00288227	-0.00348105	0.00399195	-0.00313884	0.00277863	-0.00158041	0.00367806	-0.00352059	0.00211871	-0.00212296	0.00609219	-0.00066164	0.00463803	-0.000753485	0.00124033	-0.00740122	0.0067023	-0.0037101	0.0100181	0.00234023
5s	0.00182553	-0.00147081	0.00198626	-0.00217688	0.000482079	-0.000942209	0.00118303	-0.00213678	0.00313401	-0.0019276	0.000471995	-0.000355859	0.00272205	-0.00233028	0.000675624	-0.000855423	0.00306269	-0.000514468	0.00218453	-0.000423084	0.00104538	-0.00474318	0.00371074	-0.00228975	0.00644533	0.000270208
6s	-1.65512e-05	-0.000358101	0.000736522	0.000428578	-0.000950069	0.0011011	-0.000771937	-0.000885525	0.00111472	-0.0012324	-0.00233279	0.000683414	0.0013841	-0.00067638	-0.00112283	0.000307368	-0.000223744	-0.000676724	-0.000964293	-0.000328716	-0.000342716	-0.00212723	0.000346001	-0.00088831	0.00204527	-0.00174367
7s	-0.00168995	0.000476711	-0.0014559	0.00257223	-0.00175624	0.00222862	-0.00200937	0.000180458	-0.00124156	-0.00102974	-0.00420637	0.00149028	-0.000660377	0.000818193	-0.00257124	0.000995688	-0.00305939	-0.000527291	-0.00361198	-0.000235163	-0.00162162	0.000459911	-0.00235857	0.00022527	-0.00208911	-0.00279796
8s	-0.0029255	0.00094276	-0.00306873	0.00378338	-0.00282148	0.00299748	-0.00315705	0.00108786	-0.00303376	-0.00109269	-0.00527332	0.00197117	-0.00183485	0.00225718	-0.00375728	0.00131052	-0.00529466	-0.000252485	-0.00583349	-0.000117938	-0.00270107	0.00257047	-0.00446026	0.000698349	-0.00596492	-0.00336024
9s	-0.00330034	0.00139864	-0.00406402	0.0046192	-0.00367592	0.00353287	-0.00436426	0.00150806	-0.00429599	-0.000422134	-0.00576056	0.00195012	-0.00300818	0.00307132	-0.00441801	0.00131522	-0.0070656	0.000437631	-0.00744635	0.000118862	-0.00360195	0.00408797	-0.00623053	0.00104778	-0.00895676	-0.00329654
10s	-0.00372407	0.00142608	-0.00420298	0.00481368	-0.00401025	0.00306388	-0.00490086	0.00174223	-0.0046728	0.000391044	-0.00527445	0.00157233	-0.00323396	0.00304262	-0.00450888	0.000750002	-0.00780753	0.000957836	-0.00776125	8.34472e-05	-0.0037007	0.00485505	-0.00743033	0.00125407	-0.0107784	-0.00300001
11s	-0.00418016	0.00215376	-0.00394648	0.00417589	-0.00340731	0.00284745	-0.00505542	0.00218436	-0.00432294	0.00143054	-0.00423381	0.0016823	-0.00304923	0.00348423	-0.00404365	0.000652717	-0.00769972	0.00175794	-0.00686889	0.00068866	-0.00291969	0.00568727	-0.00755073	0.00171784	-0.0113686	-0.00228399
12s	-0.00376976	0.00300114	-0.00259514	0.00425636	-0.00251058	0.00342567	-0.00480737	0.00274086	-0.00320544	0.00305401	-0.00295503	0.002134	-0.00193712	0.00398784	-0.00291216	0.00137281	-0.00693444	0.00267113	-0.005575	0.0016131	-0.00179617	0.006482	-0.00729186	0.00274254	-0.010839	-0.00155597
13s	-0.00264256	0.0034805	-0.000399424	0.00426398	-0.00108843	0.00374871	-0.00386069	0.0033958	-0.00197639	0.00470056	-0.00109258	0.00251557	-0.000858371	0.00381264	-0.00101646	0.00215379	-0.0056292	0.00303701	-0.00340114	0.00249039	6.64558e-05	0.00752914	-0.00604057	0.00366872	-0.00868266	-0.0010187
14s	-0.00138289	0.00381913	0.00194156	0.00445852	0.000528016	0.00384003	-0.00172909	0.00394011	-0.000333682	0.00577423	0.00120922	0.0027803	0.000912567	0.00375574	0.00130203	0.00282843	-0.00327807	0.00268948	-0.000592554	0.00308108	0.00247181	0.00891422	-0.0041765	0.00423533	-0.00565694	-0.000695559
15s	0.00115112	0.00455405	0.00418198	0.0050193	0.00294452	0.00439695	0.00102503	0.00439188	0.00156957	0.00626883	0.00380239	0.00305286	0.00297587	0.00414103	0.00415064	0.00353319	-4.57477e-05	0.00207193	0.00243461	0.00372351	0.0050395	0.0101637	-0.00140823	0.00482758	-0.00231023	-0.000346711
16s	0.00408212	0.00463576	0.00636017	0.00533683	0.00508986	0.00456459	0.00385034	0.00445433	0.00412033	0.00665785	0.00658212	0.00282463	0.00476516	0.00442408	0.00708609	0.00423272	0.00335165	0.0012953	0.00520878	0.00380816	0.00781213	0.0109832	0.00166372	0.00507037	0.000869891	-0.000176013
17s	0.00724969	0.00442471	0.00815211	0.00468202	0.00694436	0.00450026	0.00656077	0.00416311	0.00718313	0.00638248	0.00958164	0.00211339	0.00562835	0.00486324	0.00986779	0.00426801	0.0071767	0.000282226	0.00809749	0.00413709	0.010596	0.0114593	0.0049363	0.00489086	0.00373892	-0.000311907
18s	0.0104595	0.00424175	0.00962306	0.00466735	0.00880811	0.00472158	0.00916043	0.00370851	0.0107339	0.006332	0.0130209	0.00133771	0.00720927	0.00520419	0.0127098	0.00450349	0.0117803	-0.000681792	0.0108874	0.00421207	0.0135078	0.0118741	0.00851348	0.00533368	0.00667615	-0.000707751
19s	0.0140602	0.00404305	0.0112026	0.00466122	0.0107973	0.00525413	0.0123117	0.0036586	0.0150771	0.00669459	0.0172025	0.000423785	0.00969304	0.00551709	0.0158979	0.00541929	0.0165603	-0.00131663	0.0143161	0.00445056	0.0169766	0.0118094	0.0135978	0.00644497	0.00949149	-0.00148804
20s	0.0179053	0.0035562	0.0133147	0.0042352	0.01267	0.00571635	0.016159	0.00415224	0.0200545	0.00799092	0.0218945	-0.000562877	0.0121803	0.00590287	0.0193842	0.00659055	0.0209324	-0.00112903	0.0177953	0.00502051	0.0205329	0.0119516	0.0192743	0.00872298	0.0130366	-0.00275103
21s	0.0216278	0.0035513	0.0162784	0.00437562	0.0152725	0.00665611	0.0196272	0.00503759	0.0249068	0.0101155	0.0264075	-0.000797994	0.0150578	0.00688504	0.0224676	0.00761677	0.0249991	0.000328703	0.0212298	0.00581376	0.0231239	0.0118	0.0248085	0.0118703	0.0171034	-0.00371625
22s	0.0251005	0.00380292	0.0197419	0.00467721	0.0173857	0.0074602	0.0227968	0.0060777	0.0294364	0.0126907	0.0304599	-0.000423981	0.0183095	0.00771212	0.0248594	0.00845101	0.0293367	0.0028184	0.0247467	0.00590607	0.0249534	0.0110001	0.0305581	0.015579	0.021452	-0.00436073
23s	0.0281853	0.00427233	0.0228588	0.00407045	0.0199308	0.00744401	0.0258403	0.00705091	0.0336899	0.0149225	0.0339899	0.000161853	0.0211938	0.00799203	0.02649	0.00850323	0.0337349	0.00591467	0.0281588	0.00616514	0.0256522	0.00900097	0.0364436	0.0193261	0.0253485	-0.0047341
24s	0.0306508	0.00410949	0.025455	0.00275978	0.0218872	0.00643469	0.027006	0.00728231	0.0375901	0.0167451	0.0363125	0.000750208	0.0226751	0.00755379	0.0269821	0.00706633	0.0383696	0.00890609	0.030829	0.00595879	0.0248432	0.00620977	0.0410967	0.0222885	0.0292051	-0.00483833
25s	0.0316142	0.00362618	0.0259499	0.000446167	0.0224306	0.0048478	0.0266634	0.00648511	0.0407842	0.017849	0.0373241	0.00105919	0.0233221	0.00637479	0.0264282	0.00501415	0.042817	0.0118564	0.0328207	0.00517299	0.0234938	0.00287748	0.0441808	0.0242242	0.0313927	-0.00415549
26s	0.0315505	0.00249102	0.024625	-0.00258418	0.0216017	0.00211636	0.0262387	0.00510821	0.0432326	0.0185456	0.0370963	0.000512948	0.0226563	0.00358086	0.024935	0.003117	0.0468604	0.0143023	0.0341993	0.00422225	0.022263	-0.000433013	0.0460723	0.0252507	0.0326107	-0.00361261
27s	0.0308528	0.000879353	0.0221446	-0.00582972	0.0203726	-0.000993361	0.0256425	0.00371653	0.0449537	0.0191926	0.0359645	-0.00027906	0.0209544	0.000656607	0.023493	0.00132079	0.0495738	0.0163469	0.0342357	0.00391101	0.0208817	-0.00333546	0.0463697	0.0253967	0.0328833	-0.00311011
28s	0.0298894	-0.000423812	0.0188869	-0.00801351	0.0182041	-0.00308913	0.0249151	0.00287369	0.0457526	0.0199079	0.0336645	-0.0010884	0.0184592	-0.00133614	0.0219121	0.000344167	0.0505522	0.0184606	0.0330662	0.00396862	0.019497	-0.00519881	0.0449946	0.0251896	0.0321362	-0.00183385
29s	0.0284253	-0.000590947	0.0157138	-0.00903454	0.0161999	-0.0045737	0.0240936	0.00223722	0.045066	0.0213604	0.0309185	-0.00142841	0.0163987	-0.00181367	0.0198872	0.000382787	0.0496167	0.0208408	0.0309978	0.00469498	0.0179893	-0.00675142	0.0421163	0.0244452	0.0311678	0.000351096
30s	0.0274711	0.000919649	0.0143835	-0.00833997	0.014548	-0.00471518	0.0227929	0.00191267	0.0425075	0.0227408	0.0280603	-0.000302504	0.0145682	-0.00155906	0.0175635	0.000917495	0.0469629	0.0231134	0.0279891	0.00607558	0.0158148	-0.00794199	0.0389072	0.0234559	0.0296961	0.00284633
31s	0.0265817	0.00326623	0.013424	-0.00656108	0.0128864	-0.00401331	0.020833	0.002072	0.0392948	0.0239409	0.0257595	0.00212527	0.014103	0.000114154	0.0155537	0.00191953	0.0436216	0.0253987	0.0244119	0.00789201	0.0133165	-0.00857549	0.0355036	0.0235054	0.027976	0.00604077
32s	0.0253505	0.00558897	0.0131206	-0.00418185	0.0116613	-0.00288511	0.0184032	0.002016	0.0356401	0.0243249	0.0239209	0.00475503	0.0140075	0.00181686	0.0134349	0.0033642	0.040179	0.0270524	0.0212334	0.00915871	0.0107244	-0.00873822	0.0325489	0.0239779	0.0265347	0.00975877
33s	0.0228691	0.00727299	0.0128614	-0.00233578	0.00976622	-0.00210112	0.0156975	0.00166089	0.0314706	0.0236393	0.0221146	0.00666084	0.0127387	0.00318328	0.0110584	0.00431319	0.0365627	0.0277877	0.0180394	0.00956039	0.00834072	-0.00904656	0.0296716	0.0241974	0.0252225	0.0121375
34s	0.0195354	0.0078644	0.0116706	-0.00168733	0.00717361	-0.00201783	0.0126759	0.00133784	0.0273963	0.0215255	0.0194905	0.007572	0.0106208	0.00309014	0.00844712	0.00466114	0.0327069	0.0270705	0.0146254	0.00889874	0.0058083	-0.00889588	0.0266293	0.024125	0.0227797	0.0129797
35s	0.0148671	0.00627376	0.00828983	-0.00294269	0.00396754	-0.00336047	0.0090758	0.000377699	0.023067	0.0182962	0.0155316	0.00628682	0.00747221	0.00182645	0.00549302	0.00379102	0.0283251	0.0242936	0.0111803	0.00659121	0.00352708	-0.00893846	0.0227726	0.0225411	0.0199366	0.0118804
36s	0.00959018	0.00323449	0.00440511	-0.00535039	0.000314674	-0.00496558	0.00538201	-0.00121099	0.017781	0.014249	0.0107452	0.00317749	0.00384556	-0.00043581	0.00208427	0.00191821	0.0227349	0.0194679	0.00718264	0.00293955	0.00111403	-0.00958729	0.0176182	0.0186026	0.0161477	0.00895762
37s	0.00322652	3.3315e-05	-0.00117191	-0.0081929	-0.00469959	-0.00673614	0.000821768	-0.00249323	0.0113127	0.0103995	0.00438647	-0.000762243	-0.00104184	-0.00219091	-0.00210014	-0.000467361	0.0150056	0.0138523	0.00208097	-0.000936914	-0.00187917	-0.0105242	0.0104807	0.0132789	0.0101147	0.00499581
38s	-0.00224785	-0.00254509	-0.00718866	-0.0108382	-0.00896534	-0.0082833	-0.00405339	-0.00381002	0.00468138	0.00719542	-0.00196141	-0.00411169	-0.00580857	-0.00403831	-0.00616804	-0.00252488	0.00647237	0.00851422	-0.00357535	-0.00447354	-0.00539871	-0.0110776	0.00292594	0.00810196	0.00308717	0.00146137
39s	-0.00673902	-0.00406827	-0.0121536	-0.0116058	-0.0124284	-0.00854318	-0.00775403	-0.0046887	-0.00117604	0.00499911	-0.00725914	-0.00623811	-0.00965208	-0.0050217	-0.00928022	-0.00347535	-0.00159773	0.00432999	-0.00911473	-0.00663854	-0.00843325	-0.0108712	-0.00366488	0.00405453	-0.00341067	-0.0013157
40s	-0.00967945	-0.00467761	-0.0146035	-0.0110275	-0.0142646	-0.0074888	-0.00987224	-0.00449066	-0.00561784	0.00363145	-0.0104945	-0.00690036	-0.0115265	-0.00488626	-0.0108766	-0.00341731	-0.00794168	0.00140541	-0.013656	-0.00737865	-0.0110275	-0.00967159	-0.00860564	0.00152831	-0.0082087	-0.00268749
41s	-0.0107647	-0.00411145	-0.0153256	-0.0092791	-0.0144265	-0.00589214	-0.0106784	-0.00367469	-0.00820665	0.00191712	-0.0120621	-0.00617001	-0.0127438	-0.003827	-0.0111668	-0.00280495	-0.0123254	-0.00034609	-0.0162414	-0.00680152	-0.0122138	-0.00804278	-0.0110527	0.000449322	-0.0113648	-0.00310031
42s	-0.0094447	-0.00288158	-0.0137992	-0.00661236	-0.0121524	-0.00387927	-0.00934485	-0.00263478	-0.00865123	0.000446702	-0.0111025	-0.00463114	-0.0117957	-0.00222897	-0.00991648	-0.00152392	-0.0133206	-0.00107872	-0.0159999	-0.0054617	-0.0114065	-0.00599712	-0.010436	0.000587358	-0.0112764	-0.00282272
43s	-0.00699923	-0.00209604	-0.00978106	-0.0038288	-0.00874427	-0.00217469	-0.00668021	-0.00174059	-0.00721147	-0.000467121	-0.00851053	-0.00277986	-0.00823174	-0.000987319	-0.00725115	-0.000590479	-0.0114318	-0.00161759	-0.0131502	-0.00370516	-0.00914905	-0.00448501	-0.00769881	0.000769526	-0.00837057	-0.00208868
44s	-0.00374176	-0.00146669	-0.00443145	-0.00162265	-0.00402471	-0.00038685	-0.00337258	-0.000885542	-0.00477801	-0.00142612	-0.00477275	-0.00121787	-0.00368527	-0.000724563	-0.00379209	-0.000169156	-0.0075213	-0.00166674	-0.00827279	-0.00216567	-0.00583671	-0.0031281	-0.0038273	0.000430171	-0.00397596	-0.00101175
45s	-0.000143321	-0.000531456	0.000665866	0.000497264	0.000520315	0.000444349	-0.000101457	-7.72088e-05	-0.00128996	-0.00204143	-0.000436418	0.000367616	0.000374615	-0.000190759	-0.000393406	0.000233498	-0.00221132	-0.00100951	-0.0021354	-0.000313968	-0.00181077	-0.00205754	0.000451835	-0.000101573	0.00124778	0.000394541
46s	0.00335824	0.000114263	0.0054479	0.00203967	0.00467067	0.000763674	0.00316248	0.000302491	0.00237366	-0.00178743	0.00373317	0.001985	0.00444237	0.000216415	0.00285986	0.000437197	0.00424993	0.000328189	0.0046255	0.00141118	0.00226488	-0.00103606	0.00454347	-0.000841925	0.00638215	0.00241324
47s	0.00667795	0.000444202	0.0103427	0.00280859	0.0082241	0.000863311	0.00659482	7.1666e-05	0.00634465	-0.00148177	0.00822239	0.00318532	0.00813587	0.000285228	0.00630483	-2.17738e-05	0.0110819	0.00148649	0.011179	0.00296923	0.00629235	-0.000143906	0.0090741	-0.00164153	0.0111258	0.00419146
48s	0.00861629	0.00107242	0.013042	0.00328405	0.0103803	0.00119686	0.00869527	0.000119464	0.00871776	-0.00145454	0.0108821	0.00387911	0.0103406	-0.000707635	0.0082278	-4.7284e-05	0.0152326	0.00270655	0.0150459	0.004098	0.00866572	0.000764633	0.0115659	-0.00223967	0.0137124	0.00542843
49s	0.0104381	0.00148695	0.0147552	0.00326295	0.0116947	0.000638897	0.0102287	8.93378e-05	0.0108696	-0.00136905	0.0131777	0.00470941	0.0131097	-0.00174542	0.00962634	-0.000126724	0.0189759	0.00363323	0.0183241	0.00498585	0.0106846	0.00121046	0.0135725	-0.00249325	0.0160737	0.00668513
50s	0.0114157	0.00158455	0.015646	0.00333235	0.0123093	0.00056542	0.0111196	-0.000276049	0.0117174	-0.00156608	0.0142681	0.00517471	0.0152583	-0.002529	0.0103693	-0.000444595	0.0209249	0.0039347	0.0202234	0.00517632	0.0118533	0.00122464	0.0146823	-0.00278758	0.0171821	0.00728431
