# Supplementary material for: Improved Prefrontal Activity and Chewing Performance as Function of Wearing Denture in Partially Edentulous Elderly Individuals: Functional Near-Infrared Spectroscopy Study
Source: PLoS One. 2016 Jun 30;11(6):e0158070. doi: 10.1371/journal.pone.0158070 (PMC4928845; doi:10.1371/journal.pone.0158070)
Supplement: S5 Table — (XLSX) [file pone.0158070.s012.xlsx]

## Sheet: Sheet1
S5.Table5
Table 5. Significantly different channels and corresponding brain regions presented in cross-sectional statistical topography of [oxy-Hb]
1. Tooth Loss vs. Rest
	Pre-chewing	Chewing	Post-chewing
DLPFC	ns	ns	ch. 10, 13
FPA	ns	ns	ch. 10, 11, 13, 15
BA	ns	ch. 5	ch. 5
OFC	ns	ns	ch. 15
IPG	ns	ns	ns
2. Wearing Denture vs. Rest
	Pre-chewing	Chewing	Post-chewing
DLPFC	ch. 1, 2, 4, 6, 7, 8, 10	ch. 1, 2, 3, 4, 6, 7, 8, 10, 13, 19	ch. 1, 2, 6, 7, 10, 13, 19
FPA	ch. 6, 7, 8, 10, 11	ch. 6, 7, 8, 10, 11, 12, 13, 15, 17, 19	ch. 6, 7, 10, 11, 15, 19
BA	ns	ch. 5, 9	ch. 5, 9
OFC	ns	ch. 15, 17, 19	ch. 15, 19
IPG	ns	ch. 19	ch. 19
3. Young vs. Rest
	Pre-chewing	Chewing	Post-chewing
DLPFC	ch. 6, 10, 13, 19	ch. 1, 2, 3, 4, 6, 7, 8, 10, 13, 19	ch. 1, 2, 6, 10, 13, 19
FPA	ch. 6, 10, 11, 12, 13, 15, 16, 17, 19	ch. 6, 7, 8, 10, 11, 12, 13, 15, 16, 17, 19, 22	ch. 6, 10, 11, 13, 16, 19, 22
BA	ch. 5	ch. 5, 9	ch. 5, 9
OFC	ch. 15, 17, 20, 21	ch. 15, 17, 19, 20, 21, 22	ch. 19, 22
IPG	ns	ch. 19, 22	ch. 19, 22
